# Supplementary material
Source: PubMed Central journal article supplement (PMC4321724)
Supplement: NIHMS658314-supplement-Supplementary_Data.pdf [file NIHMS658314-supplement-Supplementary_Data.pdf]

Supporting Information

**Probing the Carboxyester Side Chain in Controlled Deactivation (-)-  
 $\Delta^8$ -Tetrahydrocannabinols**

Spyros P. Nikas,<sup>†,§</sup> Rishi Sharma,<sup>†§</sup> Carol A. Paronis,<sup>†</sup> Shashank Kulkarni,<sup>†</sup> Ganesh A. Thakur,<sup>†</sup> Dow Hurst,<sup>£</sup> JodiAnne T. Wood,<sup>†</sup> Roger S. Gifford,<sup>†</sup> Girija Rajarshi,<sup>†</sup>, Yingpeng Liu,<sup>†</sup> Jimit Girish Raghav,<sup>†</sup> Jason Jianxin Guo,<sup>†</sup> Torbjörn U.C. Järbe,<sup>†</sup> Patricia H. Reggio,<sup>£</sup> Jack Bergman,<sup>‡</sup> and Alexandros Makriyannis.\*<sup>†,‡,‡</sup>

<sup>†</sup>Center for Drug Discovery and Departments of Chemistry and Chemical Biology and Pharmaceutical Sciences, Northeastern University, Boston, Massachusetts 02115, United States

<sup>£</sup>Center for Drug Discovery, University of North Carolina at Greensboro, Greensboro, North Carolina 27402, United States

<sup>‡</sup>McLean Hospital, Harvard Medical School, Belmont, Massachusetts 02478, United States

<sup>#</sup>King Abdulaziz University, Jeddah, 22254, Saudi Arabia

\*To whom correspondence should be addressed.

<sup>§</sup>These two authors contributed equally to this work.

**List of Contents**

- Elemental analyses (Table S1). ..... Page S3.
- Molecular modeling Supplemental Tables S2-7. .... Pages S4-9.
- Hypothermic effects of approximately equivalent doses of **10a**, **2b**, and  $\Delta^8$ -THC-DMH at different times after injection (Figure S1) ..... Page S10.
- Tail-flick latencies in a hot water-bath (52°C) after administration of four doses of compound **10a** examined at four time-points (20, 60, 180, and 360 min post-administration) using male CD-1 mice (Figure S2)..... Page S11.

**Table S1:** Elemental analyses

| Compd.     | Mol. Formula                                                  | Calcd.                     | Found                      |
|------------|---------------------------------------------------------------|----------------------------|----------------------------|
| <b>6b</b>  | C <sub>24</sub> H <sub>33</sub> BrO <sub>4</sub>              | C: 61.94; H: 7.15          | C: 62.27; H: 7.53          |
| <b>7c</b>  | C <sub>26</sub> H <sub>33</sub> NO <sub>4</sub>               | C: 73.73; H: 7.85; N: 3.31 | C: 73.47; H: 8.17; N: 3.66 |
| <b>9b</b>  | C <sub>23</sub> H <sub>31</sub> BrO <sub>4</sub>              | C: 61.20; H: 6.92          | C: 60.95; H: 6.70          |
| <b>9d</b>  | C <sub>27</sub> H <sub>36</sub> N <sub>2</sub> O <sub>4</sub> | C: 71.65; H: 8.02; N: 6.19 | C: 71.97; H: 8.31; N: 6.52 |
| <b>10a</b> | C <sub>24</sub> H <sub>31</sub> NO <sub>4</sub>               | C: 72.52; H: 7.86; N: 3.52 | C: 72.90; H: 8.08; N: 3.87 |
| <b>16</b>  | C <sub>25</sub> H <sub>36</sub> O <sub>4</sub>                | C: 74.96; H: 9.06          | C: 75.28; H: 8.75          |

## Molecular Modeling Supplemental Tables

**Table S2. Top 20 Glide scores for 10a\***

| Conformer    | Glide XP Score<br>(kcal/mol) | Conform Cost<br>(kcal/mol) | Total E<br>(kcal/mol) |
|--------------|------------------------------|----------------------------|-----------------------|
| M0191        | -5.0                         | 4.0                        | -1.0                  |
| M0069        | -5.0                         | 2.0                        | -3.0                  |
| M0114        | -4.9                         | 4.0                        | -1.0                  |
| M0187        | -4.8                         | 2.0                        | -2.9                  |
| M0186        | -4.7                         | 4.0                        | -0.8                  |
| M0086        | -4.7                         | 0.7                        | -4.0                  |
| M0023        | -4.6                         | 1.1                        | -3.5                  |
| M0027        | -4.6                         | 1.1                        | -3.5                  |
| M0009        | -4.5                         | 0.7                        | -3.9                  |
| M0017        | -4.5                         | 1.0                        | -3.4                  |
| M0057        | -4.5                         | 1.7                        | -2.8                  |
| M0132        | -4.5                         | 1.8                        | -2.7                  |
| M0091        | -4.4                         | 2.8                        | -1.7                  |
| M0009        | -4.4                         | 0.7                        | -3.8                  |
| M0180        | -4.4                         | 2.8                        | -1.7                  |
| M0086        | -4.4                         | 0.7                        | -3.8                  |
| <b>M0001</b> | <b>-4.4</b>                  | <b>0.1</b>                 | <b>-4.3</b>           |
| M0051        | -4.4                         | 1.8                        | -2.6                  |
| M0070        | -4.4                         | 2.0                        | -2.4                  |
| M0191        | -4.3                         | 4.0                        | -0.4                  |
| M0016        | -4.3                         | 1.0                        | -3.3                  |

\* Conformer from the bolded row was taken forward with a post Glide minimization and ligand/receptor interaction energies.

**Table S3. Top 20 Glide scores for (-)- $\Delta^8$ -THC-DMH\***

| Conformer    | Glide XP Score<br>(kcal/mol) | Conform Cost<br>(kcal/mol) | Total E<br>(kcal/mol) |
|--------------|------------------------------|----------------------------|-----------------------|
| M0044        | -5.6                         | 1.2                        | -4.4                  |
| <b>M0007</b> | <b>-5.5</b>                  | <b>0.2</b>                 | <b>-5.4</b>           |
| M0456        | -5.5                         | 1.2                        | -4.3                  |
| M0007        | -5.4                         | 0.2                        | -5.2                  |
| M0435        | -5.2                         | 1.2                        | -4.1                  |
| M0047        | -5.2                         | 1.2                        | -4.1                  |
| M0355        | -5.1                         | 1.2                        | -3.9                  |
| M0055        | -5.1                         | 1.2                        | -3.9                  |
| M0150        | -5.1                         | 2.3                        | -2.7                  |
| M0196        | -5.0                         | 2.1                        | -2.9                  |
| M0696        | -5.0                         | 5.1                        | 0.2                   |
| M0035        | -4.9                         | 1.0                        | -3.9                  |
| M0395        | -4.9                         | 4.0                        | -0.9                  |
| M0328        | -4.9                         | 3.9                        | -1.0                  |
| M0003        | -4.8                         | 0.0                        | -4.8                  |
| M0338        | -4.8                         | 4.1                        | -0.8                  |
| M0436        | -4.8                         | 4.1                        | -0.7                  |
| M0003        | -4.8                         | 0.0                        | -4.8                  |
| M0269        | -4.8                         | 3.1                        | -1.7                  |
| M0521        | -4.7                         | 4.8                        | 0.1                   |
| M0177        | -4.7                         | 2.0                        | -2.8                  |

\*Conformer from the bolded row was taken forward with a post Glide minimization and ligand/receptor interaction energies.

**Table S4. Top 20 Glide scores for (-)- $\Delta^8$ -THC\***

| Conformer    | Glide XP Score<br>(kcal/mol) | Conform Cost<br>(kcal/mol) | Total E<br>(kcal/mol) |
|--------------|------------------------------|----------------------------|-----------------------|
| M0243        | -5.9                         | 1.6                        | -4.4                  |
| M0122        | -5.9                         | 1.7                        | -4.2                  |
| M0023        | -5.8                         | 1.5                        | -4.2                  |
| <b>M0080</b> | <b>-5.7</b>                  | <b>0.0</b>                 | <b>-5.7</b>           |
| M0203        | -5.6                         | 1.5                        | -4.1                  |
| M0901        | -5.6                         | 1.3                        | -4.3                  |
| M0934        | -5.5                         | 1.0                        | -4.5                  |
| M0391        | -5.5                         | 0.2                        | -5.3                  |
| M0107        | -5.4                         | 2.1                        | -3.3                  |
| M0134        | -5.3                         | 0.5                        | -4.7                  |
| M0040        | -5.3                         | 1.9                        | -3.4                  |
| M0198        | -5.2                         | 1.2                        | -4.0                  |
| M0102        | -5.2                         | 0.6                        | -4.6                  |
| M0268        | -5.0                         | 1.3                        | -3.7                  |
| M1000        | -4.9                         | 1.6                        | -3.3                  |
| M0351        | -4.9                         | 2.2                        | -2.7                  |
| M0938        | -4.8                         | 1.9                        | -2.9                  |
| M0127        | -4.8                         | 0.6                        | -4.2                  |
| M0040        | -4.8                         | 1.9                        | -2.9                  |
| M0060        | -4.7                         | 2.1                        | -2.7                  |
| M1000        | -4.7                         | 1.6                        | -3.1                  |

\* Conformer from the bolded row was taken forward with a post Glide minimization and ligand/receptor interaction energies.

**Table S5. Ligand/Receptor Interaction Energies for 10a\*\***

| Residues   | Electrostatic<br>(kcal/mol) | Van der Waals<br>(kcal/mol) | Total Energy<br>(kcal/mol) |
|------------|-----------------------------|-----------------------------|----------------------------|
| S1.39(123) | 0.0                         | -0.1                        | -0.1                       |
| S2.60(173) | 0.0                         | -0.1                        | -0.1                       |
| F2.64(177) | 0.0                         | -0.6                        | -0.6                       |
| F2.67(180) | 0.0                         | -0.1                        | -0.1                       |
| F3.25(189) | -0.1                        | <b>-2.8</b>                 | <b>-2.9</b>                |
| K3.28(192) | <b>-4.5</b>                 | -1.0                        | <b>-5.5</b>                |
| L3.29(193) | 0.4                         | <b>-3.5</b>                 | <b>-3.2</b>                |
| V3.32(196) | -0.1                        | <b>-2.0</b>                 | <b>-2.0</b>                |
| T3.33(197) | <b>-6.5</b>                 | 1.8                         | <b>-4.7</b>                |
| F3.36(200) | -0.2                        | -1.6                        | -1.8                       |
| N(256)     | -0.1                        | -0.5                        | -0.5                       |
| F(268)     | -0.3                        | <b>-3.1</b>                 | <b>-3.4</b>                |
| P(269)     | -0.3                        | -0.7                        | -0.9                       |
| Y5.39(275) | -0.1                        | -0.2                        | -0.3                       |
| L5.40(276) | -0.1                        | -0.7                        | -0.8                       |
| W5.43(279) | -0.1                        | -0.9                        | -0.9                       |
| W6.48(356) | 0.0                         | -0.1                        | -0.1                       |
| L6.51(359) | 0.0                         | -1.1                        | -1.0                       |
| M6.55(363) | -0.2                        | <b>-2.2</b>                 | <b>-2.3</b>                |
| D6.58(366) | 1.4                         | -0.5                        | 1.0                        |
| M(371)     | -0.1                        | <b>-2.4</b>                 | <b>-2.5</b>                |
| N(372)     | -0.1                        | -0.8                        | -0.8                       |
| K(373)     | 0.0                         | -0.5                        | -0.5                       |
| I(375)     | 0.1                         | -0.8                        | -0.7                       |
| F7.35(379) | -0.1                        | -1.7                        | -1.9                       |
| A7.36(380) | 0.0                         | -0.6                        | -0.6                       |
| C7.38(382) | 0.0                         | -0.6                        | -0.6                       |
| S7.39(383) | 0.2                         | <b>-3.2</b>                 | <b>-3.0</b>                |
| C7.42(386) | -0.1                        | <b>-2.2</b>                 | <b>-2.4</b>                |
|            | <b>-10.6</b>                | <b>-32.5</b>                | <b>-43.1</b>               |

\*\*Interaction energies equal to -2.0 kcal/mol or better are shown in bold

**Table S6. Ligand/Receptor Interaction Energies for (-)- $\Delta^8$ -THC-DMH\*\***

| Residues   | Electrostatic<br>(kcal/mol) | Van der Waals<br>(kcal/mol) | Total Energy<br>(kcal/mol) |
|------------|-----------------------------|-----------------------------|----------------------------|
| F2.64(177) | 0.0                         | -0.5                        | -0.5                       |
| F2.67(180) | 0.0                         | -0.1                        | -0.1                       |
| F3.25(189) | 0.0                         | <b>-2.9</b>                 | <b>-2.9</b>                |
| K3.28(192) | <b>-5.6</b>                 | -0.3                        | <b>-5.8</b>                |
| L3.29(193) | -0.1                        | <b>-4.7</b>                 | <b>-4.7</b>                |
| V3.32(196) | 0.1                         | -1.8                        | -1.7                       |
| T3.33(197) | -0.1                        | <b>-2.8</b>                 | <b>-2.8</b>                |
| F3.36(200) | 0.0                         | -1.6                        | -1.6                       |
| P4.60(251) | 0.0                         | -0.3                        | -0.3                       |
| N(256)     | -0.1                        | -1.0                        | -1.2                       |
| F(268)     | 0.0                         | <b>-2.7</b>                 | <b>-2.7</b>                |
| P(269)     | 0.0                         | -0.3                        | -0.3                       |
| Y5.39(275) | 0.0                         | -1.2                        | -1.1                       |
| L5.40(276) | 0.0                         | -1.1                        | -1.1                       |
| W5.43(279) | 0.0                         | -1.2                        | -1.2                       |
| L6.51(359) | 0.0                         | -0.9                        | -0.9                       |
| I6.54(362) | 0.0                         | -0.1                        | -0.1                       |
| M6.55(363) | 0.0                         | <b>-3.1</b>                 | <b>-3.2</b>                |
| M(371)     | -0.1                        | <b>-2.1</b>                 | <b>-2.2</b>                |
| N(372)     | -0.1                        | -0.6                        | -0.7                       |
| K(373)     | 0.0                         | -0.4                        | -0.5                       |
| I(375)     | 0.0                         | -0.5                        | -0.5                       |
| F7.35(379) | -0.1                        | <b>-2.0</b>                 | <b>-2.1</b>                |
| A7.36(380) | 0.0                         | -0.6                        | -0.6                       |
| C7.38(382) | 0.0                         | -0.7                        | -0.6                       |
| S7.39(383) | 0.2                         | <b>-3.3</b>                 | <b>-3.1</b>                |
| C7.42(386) | -0.1                        | <b>-2.1</b>                 | <b>-2.2</b>                |
|            | <b>-5.8</b>                 | <b>-38.8</b>                | <b>-44.6</b>               |

\*\*Interaction energies equal to -2.0 kcal/mol or better are shown in bold



**Table S7. Ligand/Receptor Interaction Energies for (-)- $\Delta^8$ -THC\*\***

| Residues   | Electrostatic<br>(kcal/mol) | Van der Waals<br>(kcal/mol) | Total Energy<br>(kcal/mol) |
|------------|-----------------------------|-----------------------------|----------------------------|
| I1.35(119) | 0.0                         | -0.1                        | -0.1                       |
| F2.64(177) | 0.0                         | -0.7                        | -0.6                       |
| F2.67(180) | 0.0                         | -0.4                        | -0.3                       |
| F3.25(189) | 0.0                         | <b>-2.6</b>                 | <b>-2.7</b>                |
| K3.28(192) | <b>-5.9</b>                 | 1.2                         | <b>-4.7</b>                |
| L3.29(193) | -0.1                        | <b>-2.0</b>                 | <b>-2.1</b>                |
| V3.32(196) | 0.1                         | -1.7                        | -1.5                       |
| T3.33(197) | 0.0                         | -1.9                        | -1.9                       |
| F3.36(200) | 0.1                         | -1.5                        | -1.4                       |
| T3.37(201) | 0.0                         | -0.2                        | -0.1                       |
| F(268)     | 0.0                         | <b>-2.1</b>                 | <b>-2.1</b>                |
| W5.43(279) | 0.0                         | -1.1                        | -1.1                       |
| W6.48(356) | 0.0                         | -0.1                        | -0.1                       |
| L6.51(359) | 0.0                         | -0.5                        | -0.5                       |
| M6.55(363) | 0.1                         | -1.6                        | -1.5                       |
| M(371)     | 0.0                         | <b>-2.6</b>                 | <b>-2.6</b>                |
| N(372)     | -0.2                        | -1.8                        | -1.9                       |
| K(373)     | -0.1                        | -1.4                        | -1.5                       |
| I(375)     | 0.1                         | -1.2                        | -1.1                       |
| F7.35(379) | -0.1                        | -1.6                        | -1.7                       |
| A7.36(380) | 0.0                         | -0.8                        | -0.8                       |
| C7.38(382) | -0.1                        | -0.5                        | -0.5                       |
| S7.39(383) | 0.0                         | <b>-3.0</b>                 | <b>-2.9</b>                |
| C7.42(386) | -0.1                        | -1.6                        | -1.7                       |
|            | <b>-6.2</b>                 | <b>-29.5</b>                | <b>-35.7</b>               |

\*\*Interaction energies equal to -2.0 kcal/mol or better are shown in bold

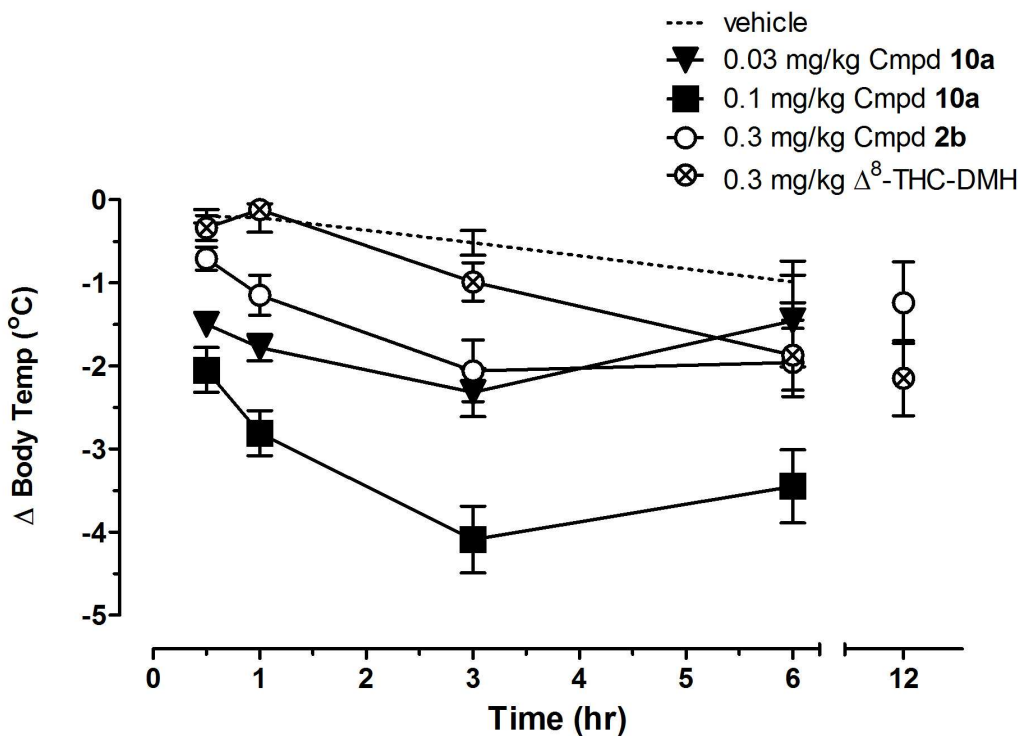

**Figure S1:** Hypothermic effects of approximately equivalent doses of **10a**, **2b**, and  $\Delta^8$ -THC-DMH at different times after injection; the dotted line represents average temperature changes after vehicle injection. Abscissa: time (in minutes) after injection; ordinate; change in body temperature.

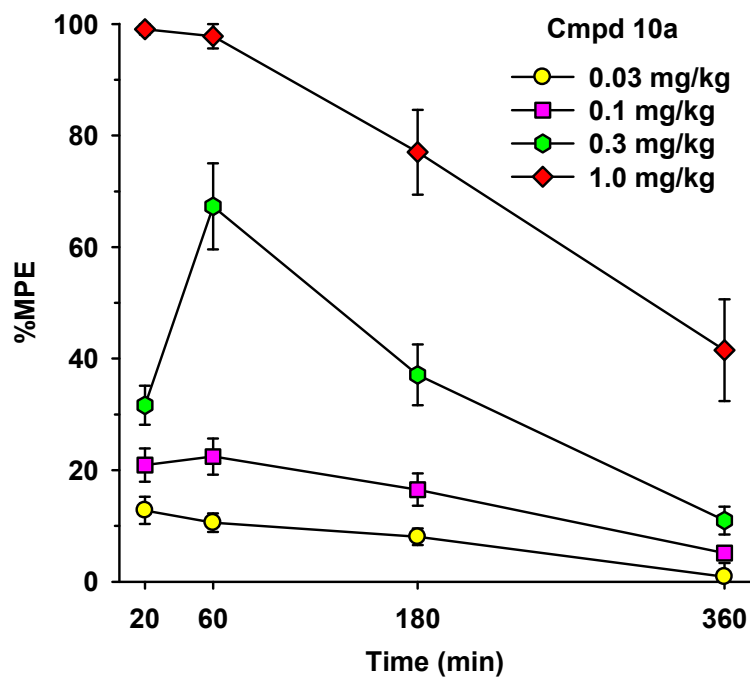

**Figure S2:** Tail-flick latencies in a hot water-bath (52°C) after administration of four doses of compound **10a** examined at four time-points (20, 60, 180, and 360 min post-administration) using male CD-1 mice. Abscissa: time (min) after injection; ordinate: tail-flick withdrawal latencies expressed as a percentage of maximum possible effect (% MPE; group mean  $\pm$  sem). A two-way repeated measures ANOVA indicated significance for Dose (D) [ $F_{3, 20} = 125.1$ ], Time (T) [ $F_{3, 60} = 61.4$ ] and the interaction D x T [ $F_{9, 60} = 10.8$ ].
